# Supplementary material for: Immune profile of the tumor microenvironment and the identification of a four-gene signature for lung adenocarcinoma
Source: PubMed Central journal article supplement (PMC7880407; doi:10.18632/aging.202269), 2020-12-09
Supplement: aging-13-202269-s001.pdf [file aging-13-202269-s001.pdf]

## SUPPLEMENTARY FIGURES

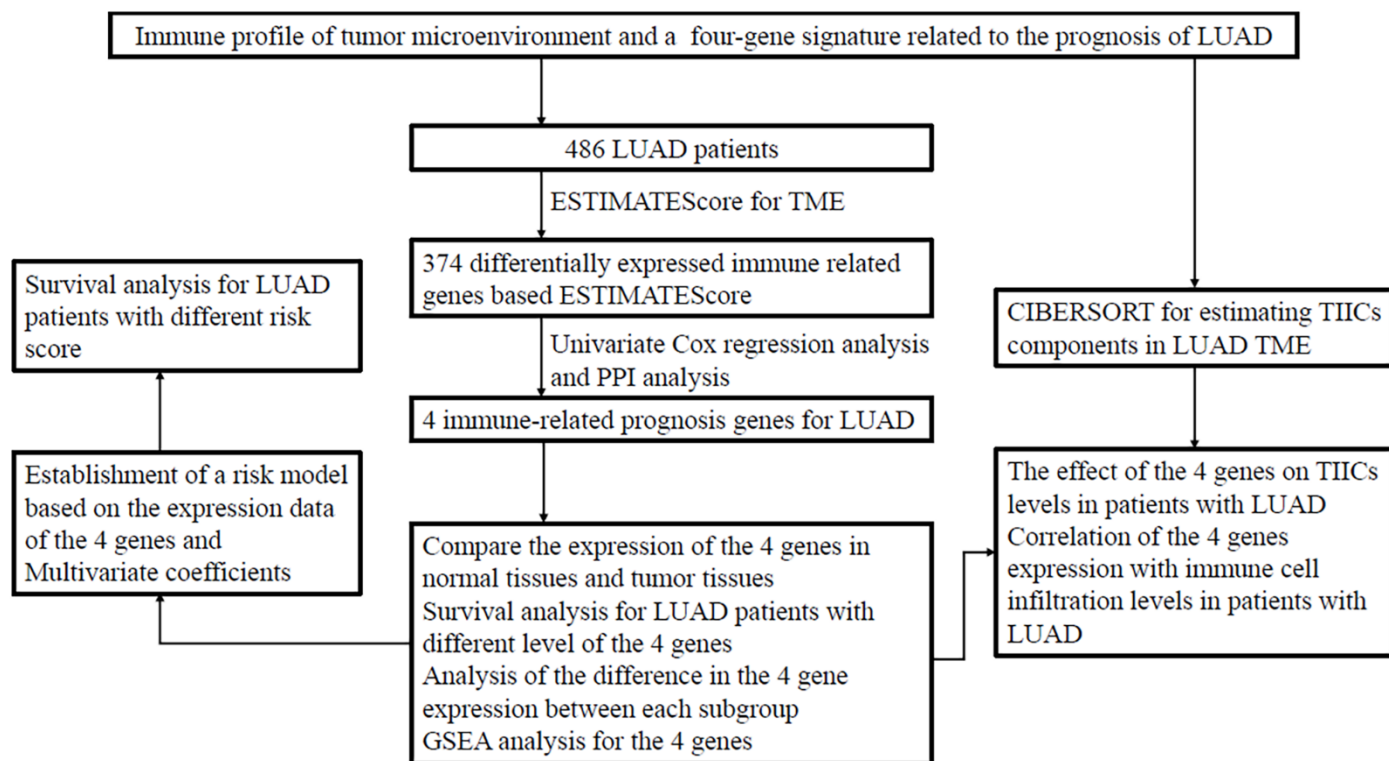

Supplementary Figure 1. A flowchart showing the screening process.

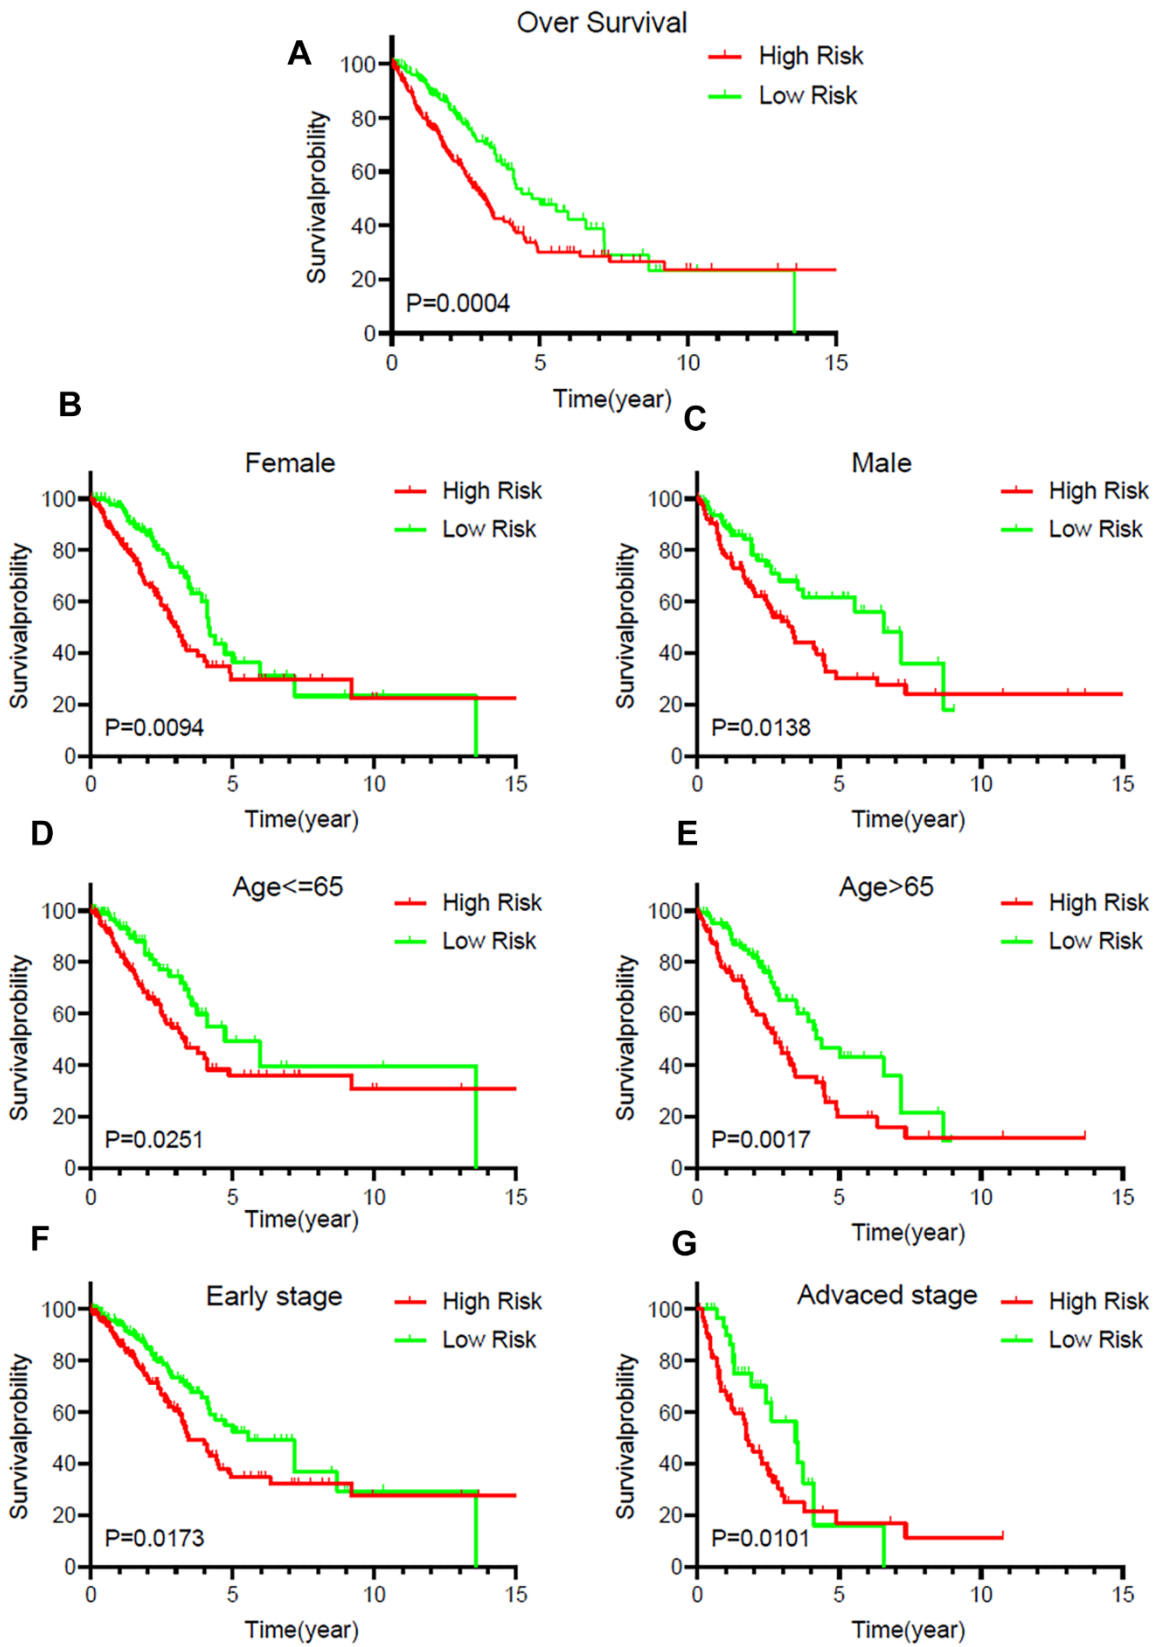

**Supplementary Figure 2. Validation the prognostic performance of the four immune related gene signature stratified by overall survival, gender, age and stage.** Kaplan-Meier curves for overall survival (A), female (B), male (C), age {less than or equal to} 65 (D), age >65 (E), early stage (F), and advanced stage (G) patients based on risk score.
